# Supplementary material for: Cost-efficient analysis of a portable low field magnetic resonance imaging system for prostate cancer diagnosis
Source: Frontiers journal article supplement (doi:10.3389/fruro.2022.966862), 2022-09-20
Supplement: Table_1.DOCX [file Table_1.DOCX]

|  | In-bore TBx with 3T MRI |
| --- | --- |
| Costs ($) |  |
| Pre-operative | 264.00 |
| Disposable | 416.58 |
| Fixed | 1,798.76 |
| Total | **2,479.57** |
