# Supplementary material for: Cost-efficient analysis of a portable low field magnetic resonance imaging system for prostate cancer diagnosis
Source: Frontiers journal article supplement (doi:10.3389/fruro.2022.966862), 2022-09-20
Supplement: Table_2.DOCX [file Table_2.DOCX]

| Average time (min) | TPB with low field MRI  Average (SD) | In-bore TBx with 3T MRI  Average (SD) | p - values |
| --- | --- | --- | --- |
|  |  |  |  |
| Total Procedure room time | 126 | 122 |  |
| Procedure length | 61 ± 14.5 | 57 ± 23 | 0.51 |
| MR occupancy time | 37 + 2.7 | 57 ± 23 | 0.001 |
| Specialist time | 20 + 1.8¥ | 57 ± 23**£** | 0.001 |
| ¥ Urologist  £ Interventional radiologist | | |  |

.
